# Supplementary material for: Fabrication of hierarchical ZnO/CdS heterostructured nanocomposites for enhanced hydrogen evolution from solar water splitting
Source: Royal Society of Chemistry journal article supplement (doi:10.1039/c5cp02689j), 2015-01-01
Supplement: c5cp02689j1.pdf [file c5cp02689j1.pdf]

## Fabrication of Hierarchical ZnO/CdS Heterostructured Nanocomposites for Enhanced Hydrogen Evolution from Solar Water Splitting

Soumita Mukhopadhyay<sup>a,c</sup>, Indranil Mondal<sup>b,c</sup>, Ujjwal Pal<sup>\*b</sup> and Parukuttyamma Sujatha Devi<sup>\*a</sup>

### Supporting Information

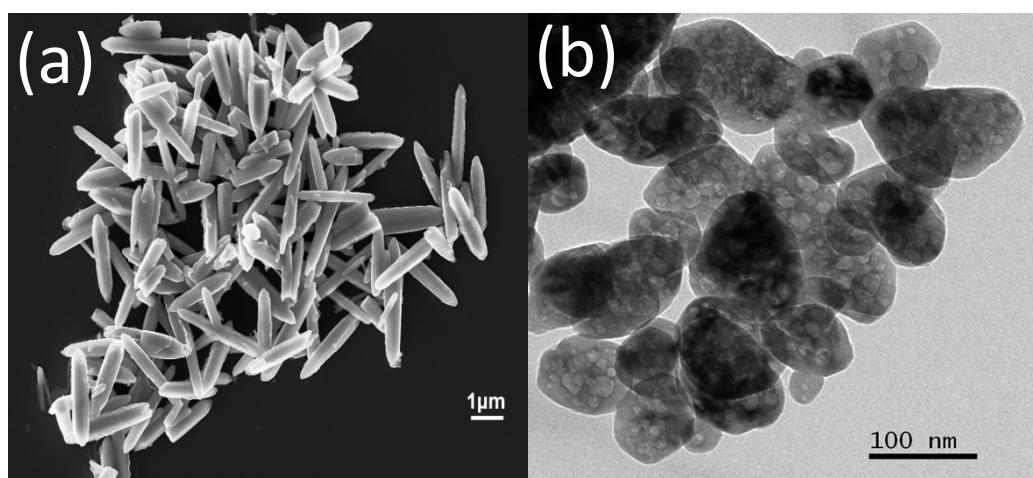

Fig.S1. (a) FESEM image of native ZnO rods and (b) TEM image of native ZnO NPs.

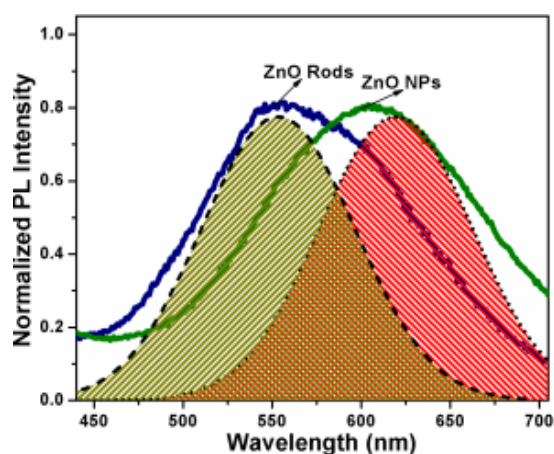

Fig.S2. Deconvoluted (Gaussian curve fitted) visible emission spectra of native ZnO rods and ZnO NPs (excited at 345 nm wavelength).

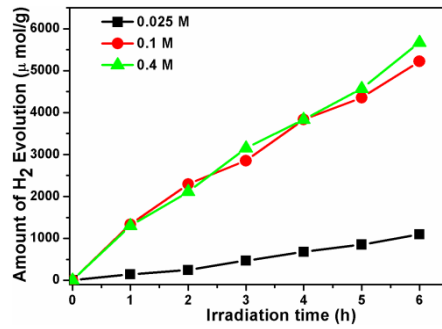

Fig.S3. Amount of the hydrogen evolved on varying the concentration of Sacrificial agent ( $\text{Na}_2\text{SO}_3/\text{Na}_2\text{S}$ ) in ZC-1 heterostructured nanocomposite at optimized condition.

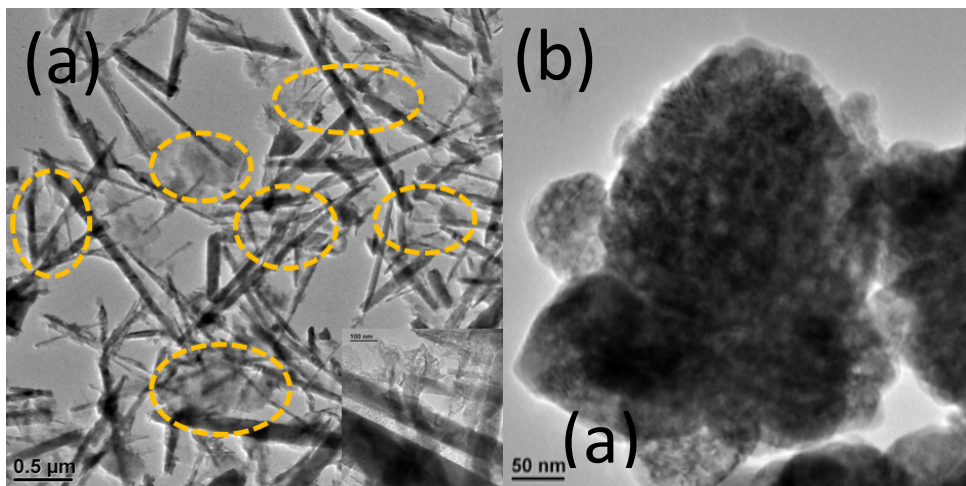

Fig.S4. (a) TEM image of (a) ZC-1 and (b) ZC-2, composites, respectively.
